# Supplementary material for: Changes in ozone and precursors during two aged wildfire smoke events in the Colorado Front Range in summer 2015
Source: Copernicus journal article supplement (doi:10.5194/acp-17-10691-2017), 2017-09-12
Supplement: Supplementary file 1 [file acp-17-10691-2017-supplement.pdf]

Supplement of Atmos. Chem. Phys., 17, 10691–10707, 2017  
<https://doi.org/10.5194/acp-17-10691-2017-supplement>  
© Author(s) 2017. This work is distributed under  
the Creative Commons Attribution 3.0 License.

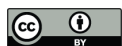

*Supplement of*

## **Changes in ozone and precursors during two aged wildfire smoke events in the Colorado Front Range in summer 2015**

**Jakob Lindaas et al.**

*Correspondence to:* Jakob Lindaas ([jlindaas@rams.colostate.edu](mailto:jlindaas@rams.colostate.edu)) and Emily V. Fischer ([evf@rams.colostate.edu](mailto:evf@rams.colostate.edu))

The copyright of individual parts of the supplement might differ from the CC BY 3.0 License.

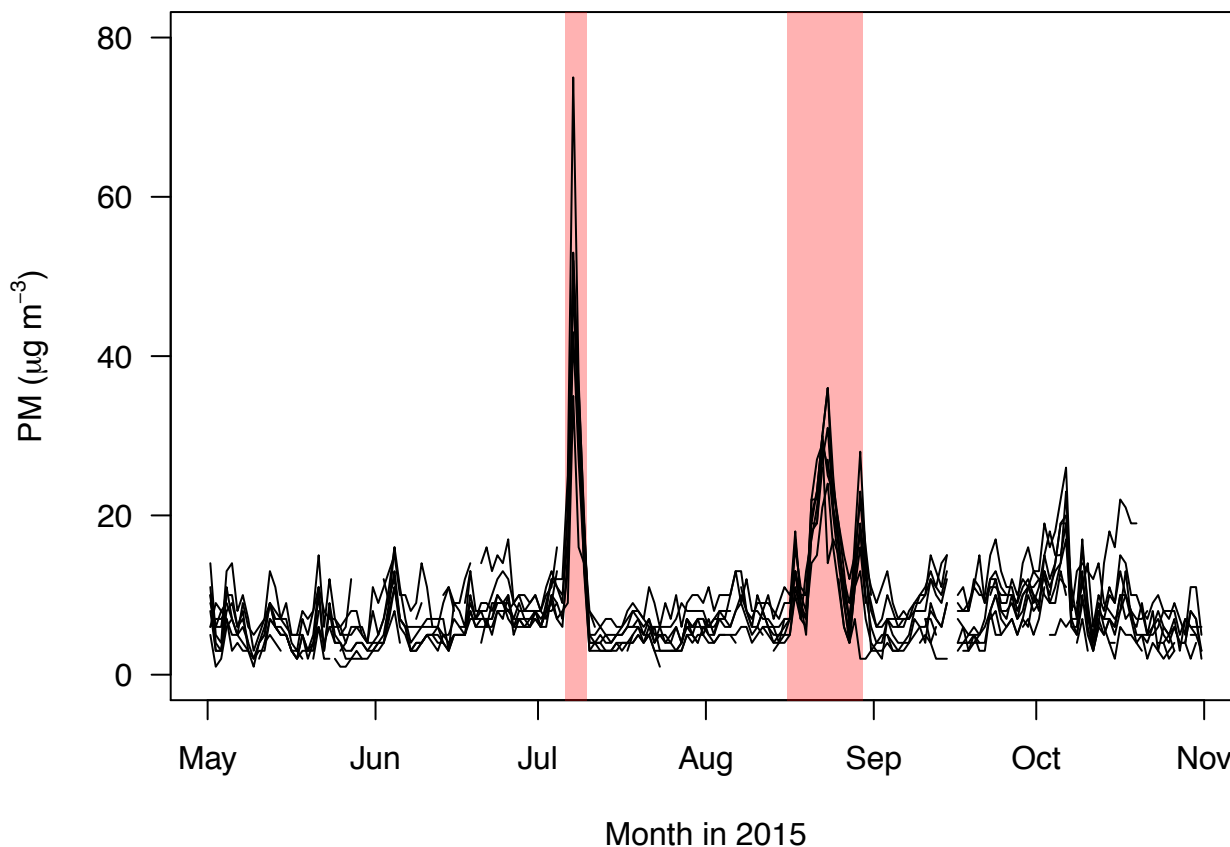

12

13 **Figure S1. Timeseries of daily average PM measurements for May – November 2015 from 10 PM monitors in the Front Range:**  
14 **CAMP, BOU, CASA, CHAT, COMM, FTCF, GREH, I25, LNGM, NJH. All monitors show similar and consistent excursions**  
15 **during the same smoke-impacted time periods defined at BAO (shown in red shading).**

16

17

18

19

20

## 21 Section S4.1

22 Table S1. Summary of Statistics for GC measurements at the Boulder Atmospheric Observatory in summer 2015.

23 <sup>a</sup> Standard deviation in parentheses24 \* Indicates statistically significant change in mean during August smoke-impacted period as compared to the smoke-free  
25 period

| Compound               | Smoke-free period |        |                   |       | August smoke-impacted period |        |                   |       |
|------------------------|-------------------|--------|-------------------|-------|------------------------------|--------|-------------------|-------|
|                        | min               | median | mean <sup>a</sup> | max   | min                          | median | mean <sup>a</sup> | max   |
| ethane                 | 0.341             | 12.4   | 23 (32.3)         | 338   | 0.981                        | 11.5   | 20.5 (33.7)       | 362   |
| propane                | 0.04              | 4.37   | 8.09 (11.2)       | 149   | 0.218                        | 5.02   | 8.88 (12.9)       | 135   |
| i-butane               | 0.002             | 0.841  | 1.52 (1.89)       | 14    | 0.028                        | 0.952  | 1.75 (2.98)       | 36.3  |
| n-butane               | 0.023             | 1.92   | 3.8 (5.67)        | 78.2  | 0.072                        | 2.17   | 4.16 (7.01)       | 82.5  |
| i-pentane              | 0.001             | 1.63   | 2.93 (4.94)       | 82.2  | 0.048                        | 1.65   | 2.74 (4.39)       | 54.6  |
| n-pentane              | 0.029             | 1.45   | 2.84 (5.03)       | 81.6  | 0.053                        | 1.42   | 2.8 (6.6)         | 91.6  |
| cyclopentane           | 0.001             | 0.115  | 0.679 (0.977)     | 3.74  | 0.001                        | 0.104  | 0.43 (0.665)      | 3.33  |
| n-hexane               | 0.001             | 0.208  | 0.365 (0.511)     | 6.82  | 0.01                         | 0.222  | 0.387 (0.634)     | 7.83  |
| cyclohexane            | 0.005             | 0.108  | 0.178 (0.208)     | 2.15  | 0.007                        | 0.123  | 0.194 (0.26)      | 2.64  |
| 2,3-dimethylpentane    | 0.002             | 0.057  | 0.0865 (0.0928)   | 0.758 | 0.006                        | 0.073  | 0.111 (0.144)     | 1.42  |
| 2-methylhexane         | 0.002             | 0.055  | 0.085 (0.092)     | 0.72  | 0                            | 0.031  | 0.046 (0.053)     | 0.46  |
| 3-methylhexane         | 0.001             | 0.046  | 0.0847 (0.121)    | 1.26  | 0.007                        | 0.093  | 0.148 (0.191)     | 1.86  |
| n-heptane              | 0.001             | 0.082  | 0.129 (0.149)     | 1.52  | 0.004                        | 0.085  | 0.136 (0.188)     | 1.98  |
| methylcyclohexane      | 0.005             | 0.104  | 0.186 (0.235)     | 2.33  | 0.004                        | 0.113  | 0.2 (0.3)         | 3.17  |
| 2,2,4-trimethylpentane | 0.001             | 0.048  | 0.061 (0.063)     | 0.66  | 0.004                        | 0.048  | 0.056 (0.055)     | 0.5   |
| 2,2,3-trimethylpentane | 0.002             | 0.017  | 0.028 (0.044)     | 0.55  | 0.002                        | 0.006  | 0.023 (0.029)     | 0.24  |
| 2-methylheptane        | 0                 | 0.033  | 0.044 (0.052)     | 0.54  | 0.003                        | 0.027  | 0.04 (0.054)      | 0.47  |
| 3-methylheptane        | 0.003             | 0.045  | 0.063 (0.067)     | 0.56  | 0.005                        | 0.051  | 0.074 (0.091)     | 0.77  |
| n-octane               | 0.005             | 0.038  | 0.059 (0.065)     | 0.54  | 0.004                        | 0.036  | 0.057 (0.078)     | 0.6   |
| ethene*                | 0.001             | 0.2    | 0.253 (0.212)     | 1.94  | 0.001                        | 0.001  | 0.0464 (0.128)    | 0.918 |
| propene*               | 0.002             | 0.041  | 0.051 (0.04)      | 0.41  | 0.002                        | 0.008  | 0.011 (0.012)     | 0.086 |
| cis-2-butene           | 0.001             | 0.018  | 0.0236 (0.0292)   | 0.345 | 0.001                        | 0.014  | 0.023 (0.07)      | 1.08  |

|                                               |       |       |                 |       |       |       |                 |       |
|-----------------------------------------------|-------|-------|-----------------|-------|-------|-------|-----------------|-------|
| isoprene*                                     | 0.003 | 0.141 | 0.223 (0.268)   | 2.02  | 0.001 | 0.048 | 0.0804 (0.114)  | 1.16  |
| benzene*                                      | 0.009 | 0.143 | 0.175 (0.131)   | 1.12  | 0.042 | 0.241 | 0.292 (0.189)   | 1.48  |
| toluene                                       | 0.008 | 0.252 | 0.297 (0.215)   | 1.5   | 0.008 | 0.237 | 0.298 (0.26)    | 1.68  |
| ethylbenzene                                  | 0     | 0.026 | 0.035 (0.053)   | 0.95  | 0.002 | 0.017 | 0.028 (0.037)   | 0.35  |
| ortho-xylene                                  | 0.003 | 0.037 | 0.045 (0.046)   | 0.46  | 0.003 | 0.022 | 0.035 (0.041)   | 0.22  |
| ethyne*                                       | 0.002 | 0.203 | 0.242 (0.168)   | 2.09  | 0.092 | 0.357 | 0.405 (0.255)   | 2.43  |
| acetaldehyde                                  | 0.202 | 1.82  | 1.86 (0.614)    | 5.7   | 0.463 | 1.79  | 1.78 (0.509)    | 3.88  |
| acetone                                       | 0.297 | 3.39  | 3.46 (1.05)     | 7.68  | 0.061 | 3.56  | 3.62 (1.21)     | 7.2   |
| methyl ethyl ketone                           | 0.021 | 0.353 | 0.407 (0.25)    | 2.47  | 0.021 | 0.399 | 0.45 (0.256)    | 1.6   |
| CFCl <sub>3</sub> (CFC-11)                    | 0.11  | 0.19  | 0.2 (0.022)     | 0.36  | 0.15  | 0.19  | 0.19 (0.024)    | 0.35  |
| CCl <sub>2</sub> FCClF <sub>2</sub> (CFC-113) | 0.002 | 0.061 | 0.061 (0.007)   | 0.11  | 0.047 | 0.064 | 0.063 (0.006)   | 0.087 |
| CH <sub>2</sub> Cl <sub>2</sub>               | 0.002 | 0.025 | 0.029 (0.019)   | 0.2   | 0.002 | 0.022 | 0.025 (0.013)   | 0.086 |
| MeCCl <sub>3</sub>                            | 0     | 0.014 | 0.013 (0.0015)  | 0.022 | 0.01  | 0.014 | 0.014 (0.0014)  | 0.018 |
| CHCl <sub>3</sub>                             | 0     | 0.008 | 0.0087 (0.0031) | 0.022 | 0.001 | 0.008 | 0.0087 (0.0026) | 0.018 |
| C <sub>2</sub> Cl <sub>4</sub>                | 0     | 0.005 | 0.0057 (0.0036) | 0.025 | 0.001 | 0.004 | 0.006 (0.0049)  | 0.036 |
| CH <sub>2</sub> Br <sub>2</sub>               | 0     | 0.001 | 0.0011 (4e-04)  | 0.003 | 0     | 0.001 | 0.0011 (5e-04)  | 0.004 |
| CHBrCl <sub>2</sub>                           | 0     | 0.001 | 0.00074 (9e-04) | 0.006 | 0     | 0.001 | 0.00066 (8e-04) | 0.004 |
| methylnitrate*                                | 0.001 | 0.003 | 0.003 (0.0017)  | 0.021 | 0     | 0.004 | 0.0042 (0.002)  | 0.016 |
| ethylnitrate*                                 | 0     | 0.002 | 0.0024 (0.0018) | 0.023 | 0.001 | 0.003 | 0.0032 (0.0013) | 0.008 |
| 2-propylnitrate                               | 0.001 | 0.009 | 0.011 (0.0062)  | 0.045 | 0.004 | 0.011 | 0.012 (0.0061)  | 0.035 |
| 2-butylnitrate                                | 0.001 | 0.014 | 0.018 (0.016)   | 0.12  | 0.002 | 0.015 | 0.021 (0.015)   | 0.078 |
| 3-pentylnitrate                               | 0     | 0.003 | 0.0048 (0.0047) | 0.035 | 0     | 0.004 | 0.006 (0.0049)  | 0.025 |
| 2-pentylnitrate                               | 0     | 0.005 | 0.0072 (0.0072) | 0.055 | 0     | 0.007 | 0.009 (0.0075)  | 0.039 |

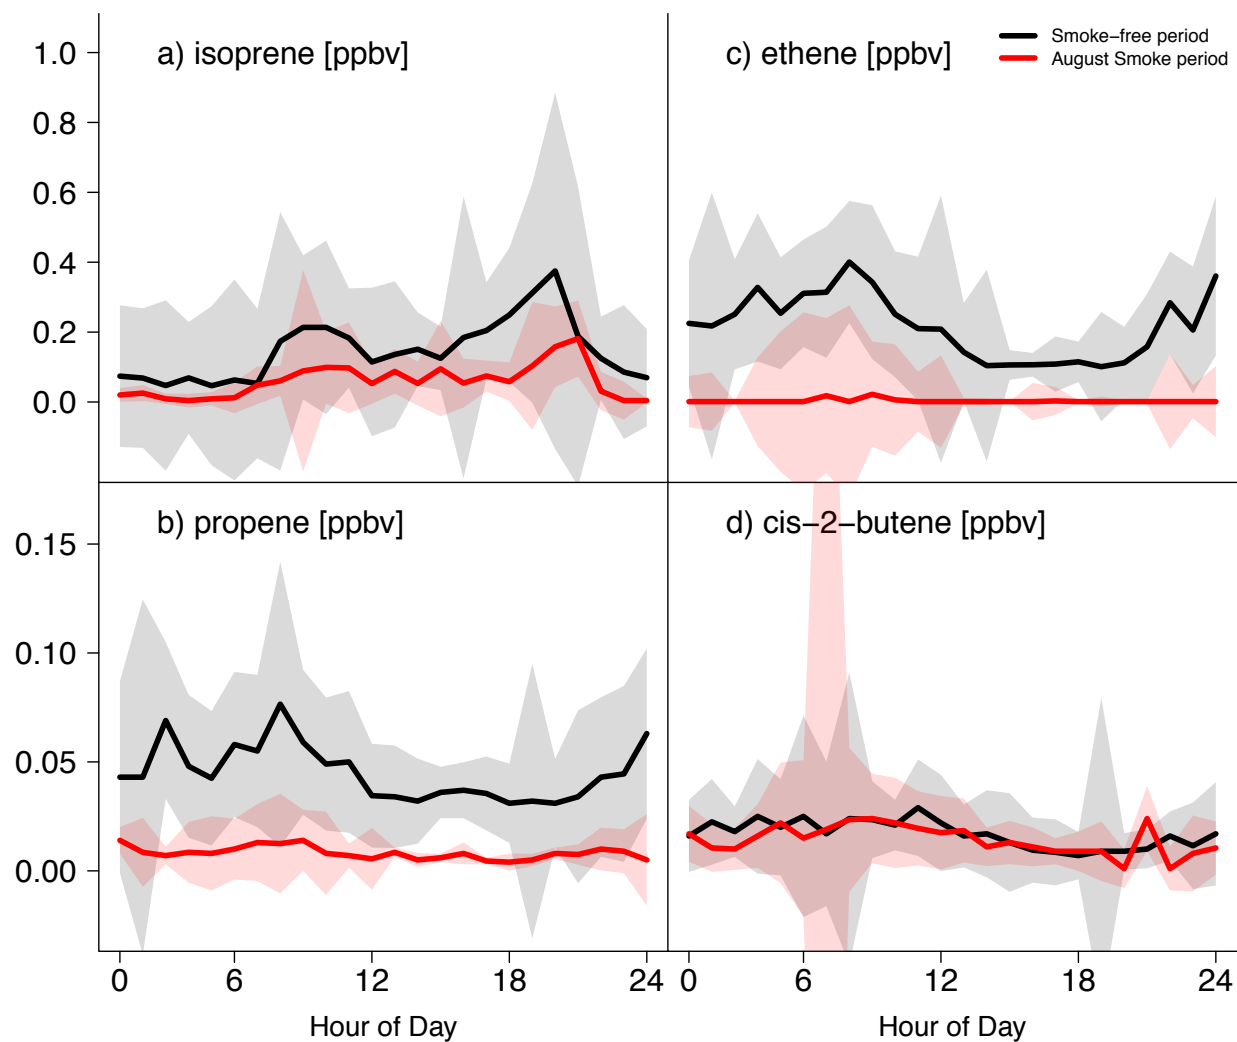

26

27 **Figure S2. Diurnal cycles of a) isoprene, b) propene, c) ethene, and d) cis-2-butene, during the smoke-free period (black lines and**  
 28 **shading) and the August smoke-impacted period (red lines and shading) at the Boulder Atmospheric Observatory in summer**  
 29 **2015. Lines show median values for 2 hour bins, and shading represents  $\pm$  one standard deviation.**

30

31

32

34

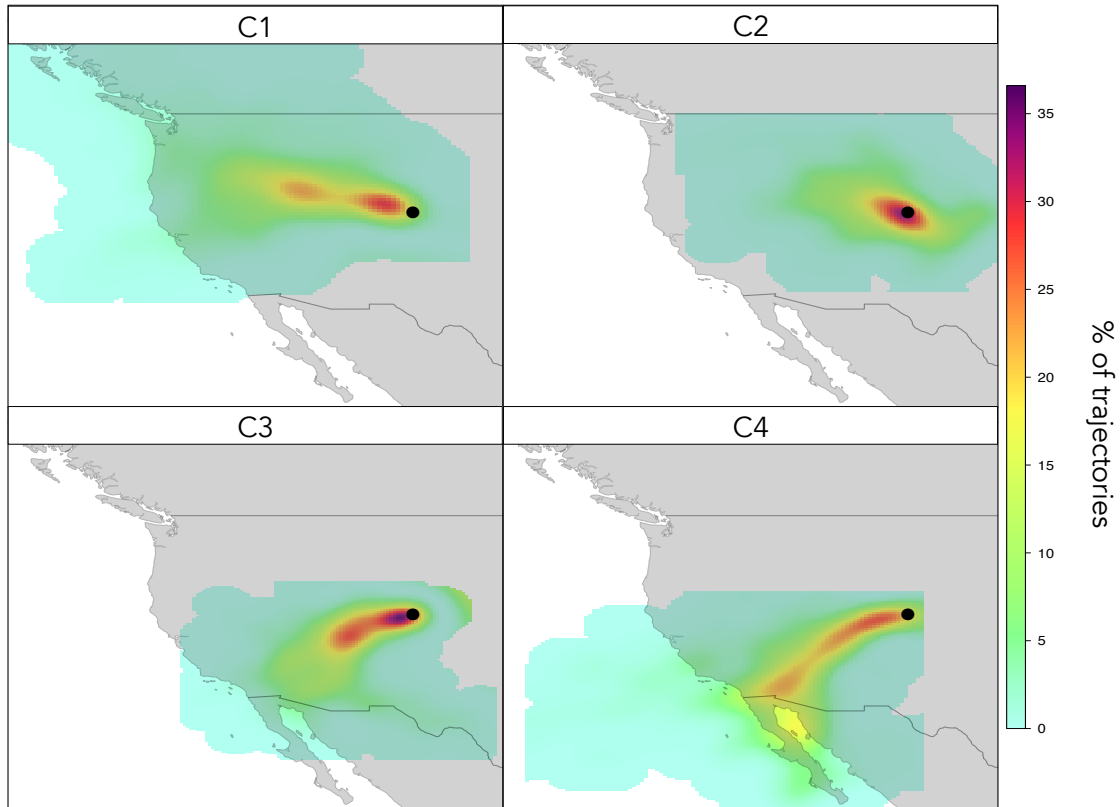

35

36 **Figure S3. Trajectory clusters calculated for hourly HYSPLIT back trajectories initiated from BAO. Clusters are calculated using**  
 37 **k-means cluster analysis. 66% of all hours during the campaign were able to be clustered. C1 shows northwesterly flow, and**  
 38 **contains the majority of the smoke-impacted hours. C2 shows stagnant or uncertain flow. C3 shows weak southwesterly flow, and**  
 39 **C4 shows strong westerly/southwesterly flow.**

40

41

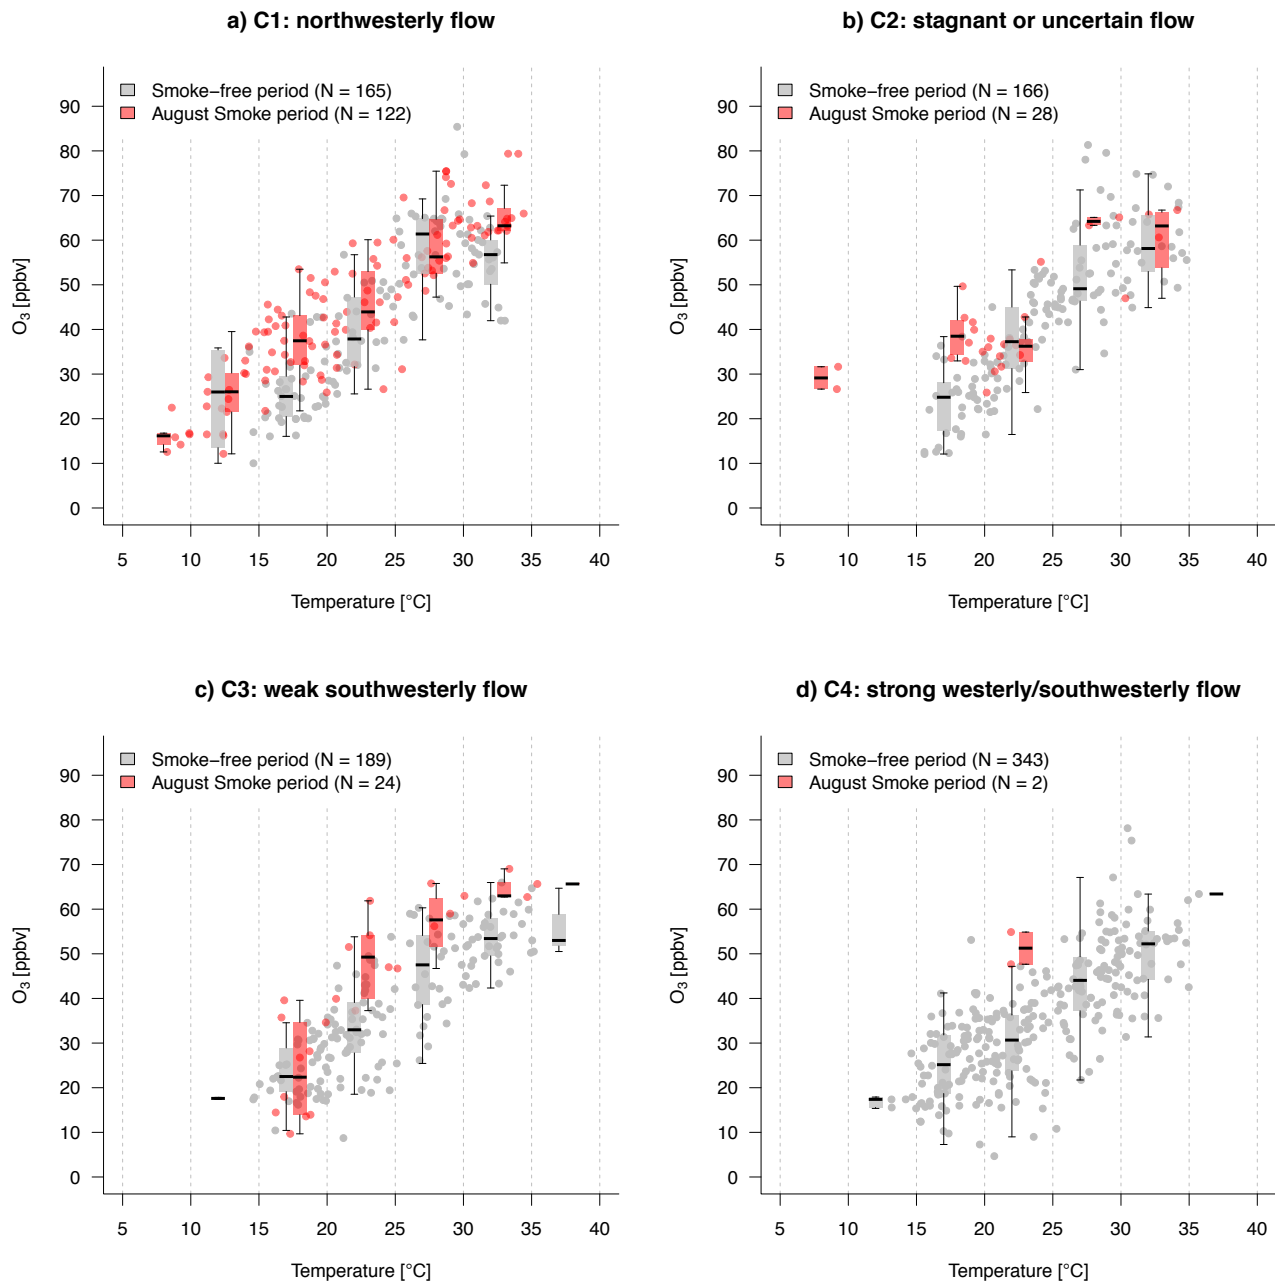

42

43 **Figure S4. Hourly O<sub>3</sub> versus temperature for the four k-means trajectory clusters: a) C1: northwesterly flow, b) C2: stagnant or**  
 44 **uncertain flow, c) C3: weak southwesterly flow, and d) C4: strong westerly/southwesterly flow. Plotted here are hourly data, with**  
 45 **boxplots showing standard percentiles of 5 °C binned O<sub>3</sub> data. Smoke-free days are shown in black and August smoke-impacted**  
 46 **days are shown in red as in Figure 6 and Figure 8.**

47

**a) Unclustered**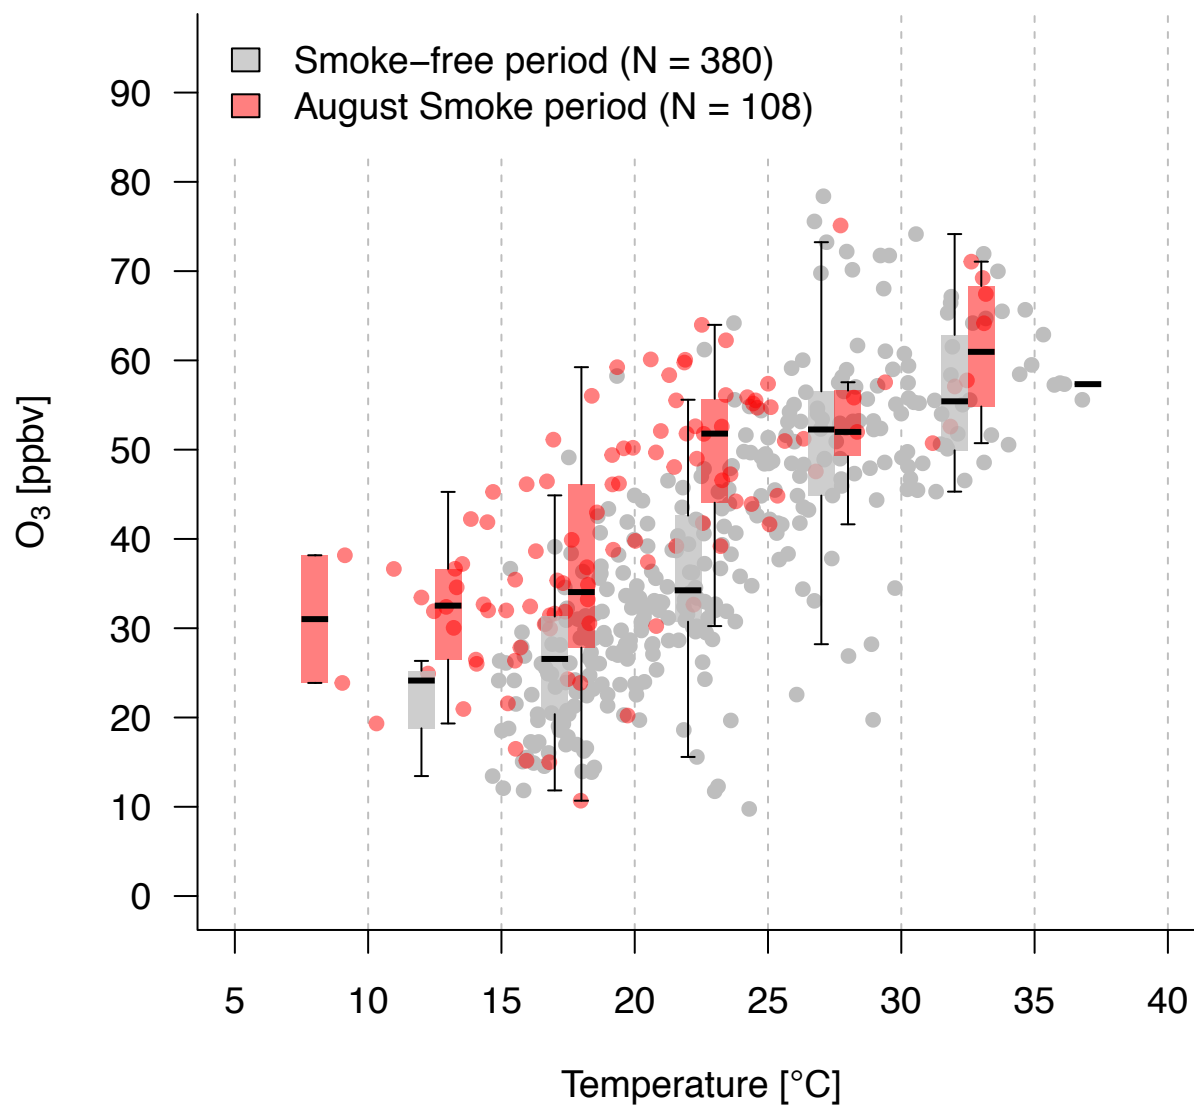

49

50 **Figure S5. Hourly O<sub>3</sub> versus temperature for the unclustered HYSPLIT trajectory hours. Plotted here are hourly data, with**  
51 **boxplots showing standard percentiles of 5 °C binned O<sub>3</sub> data the same as is shown in Figure 6 and Figure 8.**

52

53
